# Supplementary material for: Salinomycin-Loaded Iron Oxide Nanoparticles for Glioblastoma Therapy
Source: PubMed Central journal article supplement (PMC7153627; doi:10.3390/nano10030477), 2020-03-06
Supplement: nanomaterials-10-00477-s001.pdf [file nanomaterials-10-00477-s001.pdf]

# Salinomycin-Loaded Iron Oxide Nanoparticles for Glioblastoma Therapy

Mohammad Norouzi <sup>1,2</sup>, Vinith Yathindranath <sup>2</sup>, James A. Thliveris <sup>3</sup> and Donald. W Miller <sup>1,2,\*†</sup>

<sup>1</sup> Department of Biomedical Engineering, University of Manitoba, Winnipeg, MB R3T 5V6 , Canada; norouzim@myumanitoba.ca

<sup>2</sup> Department of Pharmacology and Therapeutics, University of Manitoba, Winnipeg, MB R3E 0Z3, Canada; Vinith.Yathindranath@umanitoba.ca

<sup>3</sup> Department of Human Anatomy and Cell Science University of Manitoba, Winnipeg, MB R3E 0J9, Canada; james.thliveris@gmail.com

\* Correspondence: donald.miller@umanitoba.ca; Tel.: +1-204-789-3278

† Current address: Department of Pharmacology & Therapeutics, University of Manitoba, A205 Chown Bldg., 753 McDermot Avenue, Winnipeg, MB R3E 0Z3, Canada

Received: 21 January 2020; Accepted: 03 March 2020; Published: date

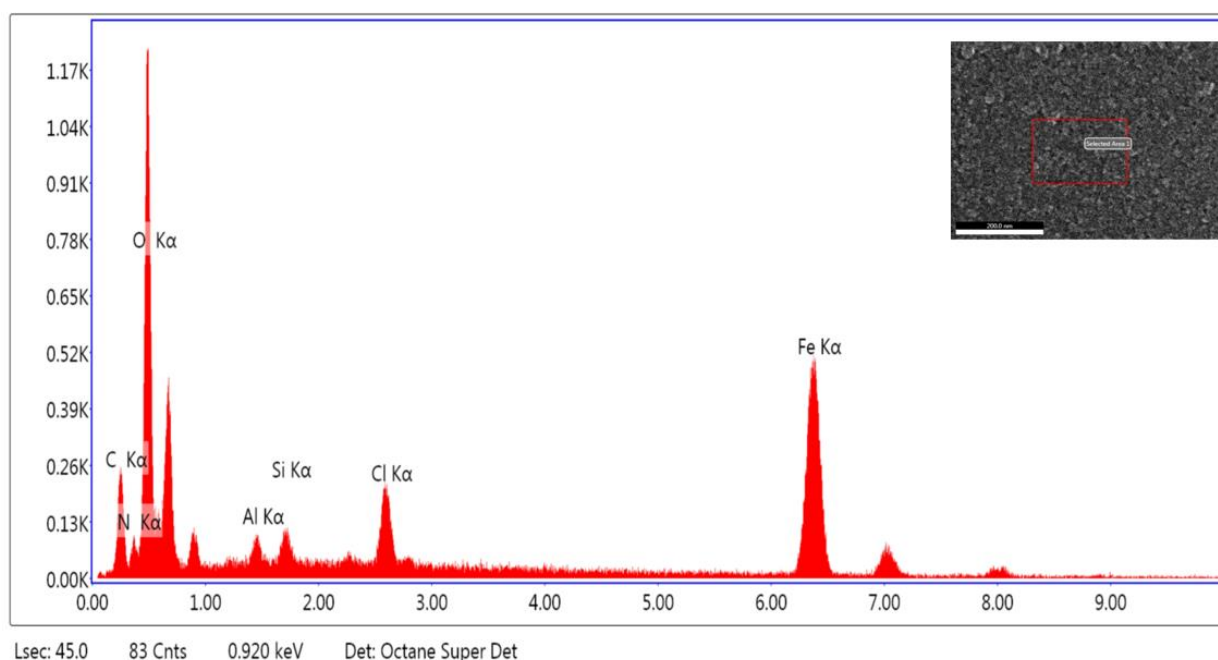

| Element | Weight % | Atomic % | Error % |
|---------|----------|----------|---------|
| C K     | 10.48    | 22.30    | 11.46   |
| N K     | 5.04     | 9.20     | 14.62   |
| O K     | 24.73    | 39.49    | 8.11    |
| AlK     | 0.69     | 0.65     | 22.42   |
| SiK     | 0.95     | 0.86     | 15.47   |
| ClK     | 3.47     | 2.50     | 10.13   |
| FeK     | 54.63    | 24.99    | 3.72    |

Figure S1. Energy-dispersive X-ray spectroscopy of PEI-PEG-IONPs.

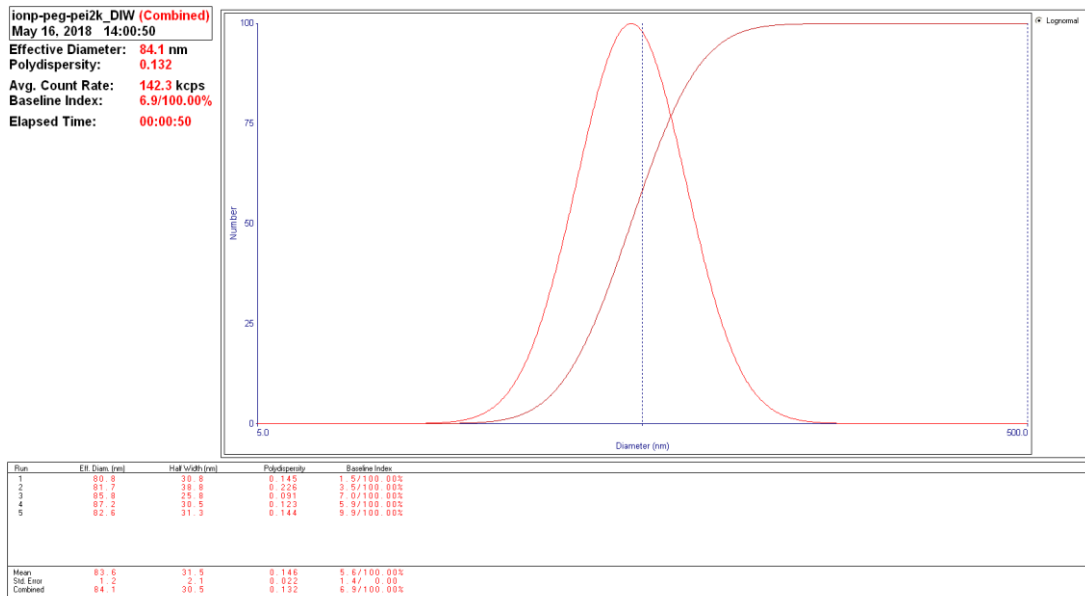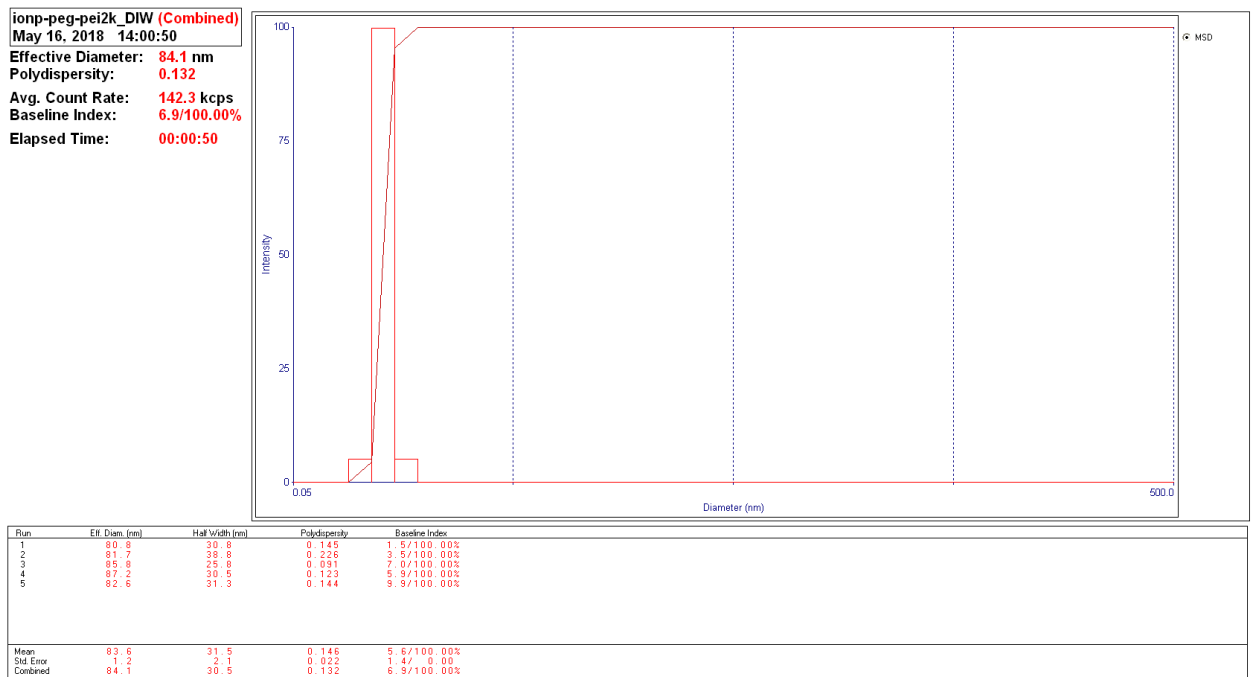

Figure S2. DLS graph of PEI-PEG-IONPs measured in D.I. water (pH 7.2).

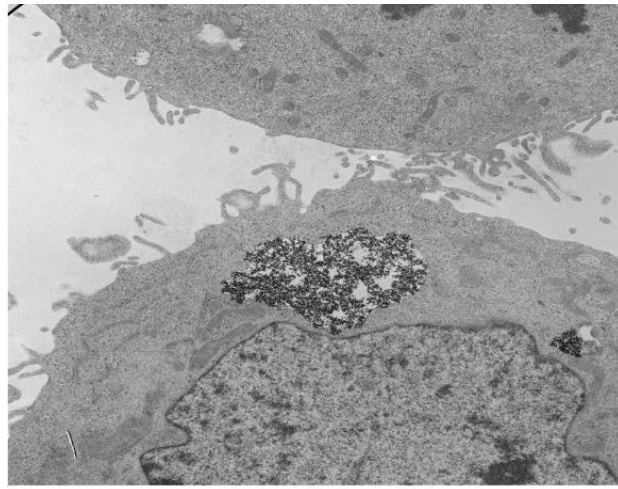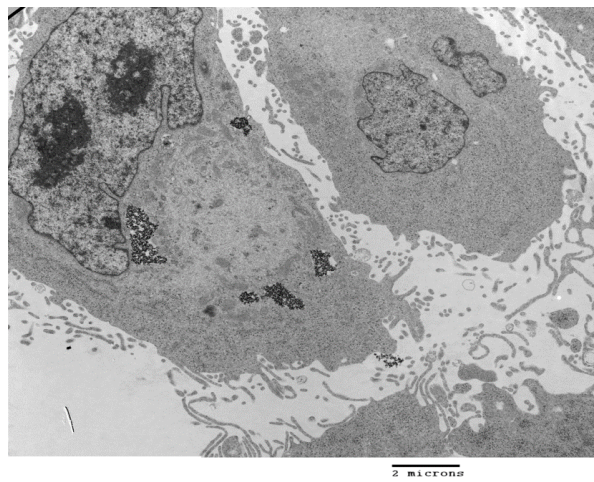

**Figure S3.** TEM images of IONPs (top) and Sali-IONPs (bottom) uptake by bEnd.3 cells after 4 h of the treatment.
